# Supplementary material for: Histone deacetylase 8 inhibition prevents the progression of peritoneal fibrosis by counteracting the epithelial-mesenchymal transition and blockade of M2 macrophage polarization
Source: PubMed Central journal article supplement (PMC9995794; doi:10.3389/fimmu.2023.1137332), 2023-02-23
Supplement: Table_1.pdf [file Table_1.pdf]

## Supplementary Table

**Histone deacetylase 8 inhibition prevents the progression of peritoneal fibrosis by counteracting the epithelial-mesenchymal transition and blockade of M2 macrophage polarization**

Xun Zhou<sup>1</sup>, Hui Chen<sup>1</sup>, Yingfeng Shi<sup>1</sup>, Jinqing Li<sup>1</sup>, Xiaoyan Ma<sup>1</sup>, Lin Du<sup>1</sup>, Yan Hu<sup>1</sup>,  
Min Tao<sup>1</sup>, Qin Zhong<sup>1</sup>, Danying Yan<sup>1</sup>, Shougang Zhuang<sup>1,2</sup>, Na Liu<sup>1</sup>

<sup>1</sup>Department of Nephrology, Shanghai East Hospital, Tongji University School of Medicine, Shanghai, China;

<sup>2</sup>Department of Medicine, Rhode Island Hospital and Alpert Medical School, Brown University, Providence, RI, USA

**Correspondence and offprint requests to: Na Liu, M.D., Ph.D., Department of Nephrology, Shanghai East Hospital, Tongji University School of Medicine, 150 Jimo road, Pudong new district, Shanghai 200120, China. E-mail: [naliubrown@163.com](mailto:naliubrown@163.com).**

**Table S1 Clinical characteristics of the PD patients**

| Variables                | Time ≤ 1 month        | 1 < Time ≤ 12         | 12 < Time ≤ 24         | 24 < Time ≤ 36         | Time > 36               | p-value |
|--------------------------|-----------------------|-----------------------|------------------------|------------------------|-------------------------|---------|
| Number                   | 16                    | 22                    | 20                     | 16                     | 14                      |         |
| PD time (months)         | 1.00(1.00-1.00)       | 6.00(2.00-8.50)       | 19.00(18.00-20.75)     | 28.00(26.00-35.25)     | 60.50(42.50-77.75)      |         |
| Age (years)              | 62.31±14.63           | 66.43±11.86           | 66.53±14.44            | 57.36±13.43            | 58.42±14.02             | 0.2     |
| Male (%)                 | 13(81.25%)            | 12(54.55%)            | 12(60.00%)             | 10(62.50%)             | 10(71.43%)              | 0.609   |
| BMI (kg/m <sup>2</sup> ) | 22.38±2.63            | 23.21±3.00            | 24.29±2.87             | 24.37±3.34             | 23.91±4.67              | 0.477   |
| Drink (%)                | 1(6.25%)              | 0(0.00%)              | 0(0.00%)               | 0(0.00%)               | 1(7.14%)                | 0.421   |
| Smoke (%)                | 4(25.0%)              | 0(0.00%)              | 3(15.00%)              | 1(6.25%)               | 1(7.14%)                | 0.126   |
| Serum albumin (%)        | 30.77±5.00            | 31.3±5.19             | 32.58±4.73             | 33.22±5.37             | 33.67±4.66              | 0.414   |
| TC (mmol/L)              | 3.71(2.97-5.17)       | 3.80(3.01-4.34)       | 3.98(3.57-5.14)        | 3.54(2.94-4.45)        | 4.00(3.52-4.62)         | 0.6     |
| TG (mmol/L)              | 1.36(0.93-2.08)       | 1.62(1.05-2.09)       | 1.79(1.14-2.56)        | 1.75(1.59-2.70)        | 2.58(1.34-3.60)         | 0.579   |
| HDL-C (mmol/L)           | 1.11(0.69-1.36)       | 0.95(0.77-1.16)       | 0.80(0.65-1.18)        | 0.74(0.71-0.94)        | 0.82(0.61-1.03)         | 0.079   |
| LDL-C (mmol/L)           | 1.89(1.20-2.57)       | 2.37(1.78-3.08)       | 2.42(1.77-3.14)        | 2.29(1.72-2.92)        | 2.49(2.00-2.95)         | 0.504   |
| Cr (μmol/L)              | 648.50(478.22-807.32) | 688.20(566.43-896.69) | 833.76(605.36-1088.40) | 794.84(684.76-1055.78) | 1191.00(864.50-1191.00) | 0       |
| BUN (mmol/L)             | 21.69(9.88-28.18)     | 18.85(14.86-22.80)    | 18.87(14.13-26.25)     | 17.46(13.42-20.28)     | 17.41(15.29-22.88)      | 0.803   |
| Sodium (mmol/L)          | 140.28±2.97           | 140.62±2.85           | 138.42±3.10            | 137.81±4.75            | 141.04±2.37             | 0.02    |
| Potassium (mmol/L)       | 4.23±0.75             | 3.79±0.63             | 3.85±0.76              | 3.90±0.50              | 3.67±0.77               | 0.225   |
| Calcium (mmol/L)         | 2.16±0.25             | 2.25±0.37             | 2.24±0.24              | 2.22±0.17              | 2.25±0.26               | 0.867   |
| Phosphorus (mmol/L)      | 1.28±0.42             | 1.59±0.35             | 1.63±0.45              | 1.50±0.49              | 1.78±0.65               | 0.054   |
| Hypertension (%)         | 11(68.75%)            | 14(63.63%)            | 9(45.00%)              | 10(62.50%)             | 6(42.86%)               | 0.446   |
| Dyslipidemia (%)         | 2(12.5%)              | 5(22.73%)             | 6(30.00%)              | 6(27.50%)              | 5(35.71%)               | 0.506   |
| Diabetes mellitus (%)    | 3(18.75%)             | 8(36.36%)             | 5(25.00%)              | 5(31.25%)              | 1(7.14%)                | 0.346   |

Time is measured in months. The continuous variables are reported as means ± SD and categorical variables are presented as percentages. In case of nonparametric data distribution medians with inter quartile range (IQR) are presented. Abbreviations: BMI: body mass index; TC: total cholesterol; TG: triglyceride; HDL-C: high density lipoprotein cholesterol; LDL-C: low density lipoprotein cholesterol; Cr: creatinine; BUN: blood urea nitrogen.
